1  
2  
3  
4  
5  
6  
7  
8  
9  
10  
11  
12  
13  
14  
15  
16  
17  
18  
19  
20

**MUTE Directly Orchestrates Cell State Switch and the Single Symmetric Division to Create Stomata**

Soon-Ki Han<sup>1,2,3</sup>, Xingyun Qi<sup>1,2</sup>, Kei Sugihara<sup>4</sup>, Jonathan H. Dang<sup>1</sup>, Takaho A. Endo<sup>5</sup>, Kristen L. Miller<sup>1</sup>, Eun-deok Kim<sup>1</sup>, Takashi Miura<sup>4</sup>, and Keiko U. Torii<sup>1,2,3</sup>

<sup>1</sup>Howard Hughes Medical Institute, University of Washington, Seattle, WA 98195, USA

<sup>2</sup>Department of Biology, University of Washington, Seattle, WA 98195, USA

<sup>3</sup>Institute of Transformative Bio-Molecules (WPI-ITbM), Nagoya University, Chikusa, Nagoya, 464-8601, Japan

<sup>4</sup>Department of Anatomy and Cell Biology, Kyushu University Graduate School of Medicine, Fukuoka 812-8582, Japan

<sup>5</sup>Laboratory for Integrative Genomics, RIKEN Center for Integrative Medical Sciences, Yokohama 230-0045, Japan

Lead contact: Keiko Torii, [ktorii@u.washington.edu](mailto:ktorii@u.washington.edu)

21

## 22 **Highlights**

23

24 •**Complete inventories of gene expression in stomatal differentiation state are elucidated**

25 •**MUTE switches stomatal patterning program initiated by its sister bHLH, SPEECHLESS**

26 •**MUTE directly induces cell-cycle genes and their direct transcriptional repressors**

27 •**Incoherent feed-forward loop by MUTE ensures the single division of a stomatal**

28 **precursor**

29

30

## 31 **SUMMARY**

32 Precise cell division control is critical for developmental patterning. For the differentiation of a

33 functional stoma, a cellular valve for efficient gas exchange, the single symmetric division of an

34 immediate precursor is absolutely essential. Yet, the mechanism governing the single division

35 event remains unclear. Here we report the complete inventories of gene expression by the

36 Arabidopsis bHLH protein MUTE, a potent inducer of stomatal differentiation. MUTE switches

37 the gene expression program initiated by its sister bHLH, SPEECHLESS. MUTE directly

38 induces a suite of cell-cycle genes, including *CYCD5;1*, and their transcriptional repressors,

39 *FAMA* and *FOUR LIPS*. The architecture of the regulatory network initiated by MUTE represents

40 an Incoherent Type 1 Feed-Forward Loop. Our mathematical modeling and experimental

41 perturbations support a notion that MUTE orchestrates a transcriptional cascade leading to the

42 tightly-restricted, robust pulse of cell-cycle gene expression, thereby ensuring the single cell

43 division to create functional stomata.

44

## 45 **Introduction**

46 Mirroring the physiological importance of stomatal movement for plant photosynthetic growth,  
47 survival, and fitness, a stoma in nearly all land plant species is constituted with a pore  
48 surrounded by paired guard cells, which, upon sensing environmental cues, undergo regulated  
49 opening and closure (Scarsh, 1932). The physiological and evolutionary constraints for forming  
50 functional stomata have likely led to a mechanism that strictly enforces a single symmetric cell  
51 division to generate stomata with mirror-symmetric, paired guard cells (Chater et al., 2017;  
52 Peterson et al., 2010). Yet, the underlying mechanism enabling the only one division event  
53 remains unclear.

54 Stomatal differentiation occurs through stereotypical cell division and differentiation  
55 events. In *Arabidopsis*, an asymmetric entry division of protodermal cell produces a meristemoid,  
56 a self-renewing stomatal precursor, which reiterates asymmetric amplifying divisions but  
57 eventually differentiate into a guard mother cell (GMC). Stomatal differentiation completes  
58 following the single symmetric cell division (SCD) of the GMC (Han and Torii, 2016; Lau and  
59 Bergmann, 2012). Three basic-helix-loop-helix (bHLH) proteins, SPEECHLESS (SPCH), MUTE,  
60 and FAMA drive the sequential steps of stomatal differentiation (Han and Torii, 2016; Lau and  
61 Bergmann, 2012). They are expressed transiently in a respective developmental window, and  
62 their loss-of-function mutations result in a failure to initiate stomatal cell-lineages (*spch*),  
63 arrested meristemoids (*mute*), and multinumeral GMC-like tumors (*fama*), respectively  
64 (MacAlister et al., 2007; Ohashi-Ito and Bergmann, 2006; Pillitteri et al., 2007). SPCH, MUTE,  
65 and FAMA form a heterodimer with bHLH proteins, SCREAM (SCRM, also known as ICE1) and  
66 SCRM2 (Kanaoka et al., 2008). In addition, Myb genes *FOUR LIPS (FLP)* and *Myb88* restrict  
67 GMC-divisions, and *flp myb88* mutants exhibit multinumeral GCs (Lai et al., 2005).

68 Extrinsic cell-cell signaling enforces proper stomatal patterning through inhibition of  
69 these stomatal bHLH proteins. A small secreted peptide EPIDERMAL PATTERNING FACTOR2  
70 (EPF2) is perceived by the receptor kinase ERECTA and its partner TOO MANY MOUTHS

71 (TMM), and the signal inhibits SPCH (Hara et al., 2009; Hunt and Gray, 2009; Lee et al., 2012;  
72 Nadeau and Sack, 2002). SPCH and SCRM directly induce *EPF2* and *TMM* expression, thereby  
73 constituting a negative feedback loop (Horst et al., 2015; Lau et al., 2014). During the  
74 meristemoid-to-GMC transition, EPF1 perceived by ERECTA-LIKE1 (ERL1) enforces stomatal  
75 spacing (Hara et al., 2007; Lee et al., 2012; Qi et al., 2017). Here, MUTE directly induces *ERL1*,  
76 which mediates an autocrine signaling for proper GMC differentiation (Qi et al., 2017)

77 Plants possess a large number of cyclin genes, likely reflecting their continuous  
78 development throughout the life cycle (De Veylder et al., 2007; Scofield et al., 2014). Among  
79 them, D-type cyclins (CYCDs) associate with CYCLIN DEPENDENT KINASE A1;1 (CDKA1;1)  
80 to drive G1/S-phase transition, whereas A-type cyclins (CYCAs) complex with CDKA for S/G2  
81 transition as well as with CDKB1;1 to suppress endoreduplication (Boudolf et al., 2009; De  
82 Veylder et al., 2007; Scofield et al., 2014). Specific roles of core-cell cycle regulators have been  
83 associated with stomatal development. For example, CYCD4 is involved in stomatal-lineage  
84 divisions in the hypocotyls (Kono et al., 2007). Dominant-negative form of CDKB1;1 and  
85 CDKA1;1, as well as higher-order mutants of CYCAs inhibit the SCD of GMCs (Boudolf et al.,  
86 2004; Yang et al., 2014). It was reported that FLP directly represses *CDKB1;1* and *CDKA1;1*  
87 (Xie et al., 2010; Yang et al., 2014), and FAMA binds to the promoter region of *CDKB1;1*  
88 (Hachez et al., 2011). Although these studies demonstrated the repressive roles for FAMA and  
89 FLP in the GMC division, it is not clear how the single symmetric division event is initiated and  
90 robustly controlled.

91 Among the stomatal transcription factors, *MUTE* is the only one whose overexpression  
92 confers constitutive differentiation of stomata with paired GCs (Pillitteri et al., 2008; Pillitteri et al.,  
93 2007; Trivino et al., 2013). Overexpression of *SPCH* and *FAMA* confers highly-divided stomatal-  
94 lineage cells and singular GCs, respectively (MacAlister et al., 2007; Ohashi-Ito and Bergmann,  
95 2006). We thus hypothesized that MUTE governs the gene regulatory networks to create  
96 stomata. To test this, we performed a genome-wide profiling of early MUTE-responsive genes.

97 Comparison of SPCH and MUTE target genes revealed how MUTE disconnects stomatal-  
98 lineage cells from extrinsic inhibitory signals, thus 'locks in' the differentiation program. Contrary  
99 to the known role of MUTE in terminating the proliferating meristemoids (Pillitteri et al., 2007),  
100 our study identified cell cycle and cell division genes as overwhelming majorities of the MUTE  
101 targets. MUTE directly binds to the promoters and upregulates novel and previously described  
102 cell-cycle regulators of the GMC symmetric division process. At the same time, MUTE directly  
103 binds to the promoters and upregulates *FAMA* and *FLP*, which in turn repress the cell-cycle  
104 regulators. Our mathematical modeling predictions and experimental perturbations of network  
105 motif demonstrate that an incoherent feed-forward loop mediated by MUTE, cell cycle regulators,  
106 and *FAMA/FLP* is sufficient to articulate the single symmetric division event with high fidelity.  
107 Our study establishes the role for MUTE in orchestrating a transcriptional cascade leading to  
108 stomatal differentiation and defines a core regulatory circuit for the single symmetric division.

109

## 110 **Results**

111

### 112 **MUTE induces and represses specific sets of transcriptomes**

113 To obtain the most complete inventories of transcriptional changes driven by MUTE, we  
114 employed an estradiol-inducible *MUTE* overexpressor (*iMUTE*) line (Qi et al., 2017), which upon  
115 estradiol treatment, triggered a rapid, 200-fold increase in *iMUTE* transcripts within two hours,  
116 reaching to >1600 fold increase in 12 hours (Figure S1A). The seedlings eventually  
117 differentiated epidermis solely composed of stomata, many expressing the mature GC marker  
118 E994 (Figure 1A-D). GC differentiation is governed by the sister gene *FAMA* (Hachez et al.,  
119 2011). In order to identify the direct MUTE targets and not those governed by *FAMA*, we  
120 examined the transcriptional changes before *FAMA* expression peaks. We performed paired-  
121 end sequencing of RNA from *iMUTE* and un-induced controls (see Methods and Table S1). The

122 three biological replicates showed high reproducibility, with the Pearson's correlations between  
123 log RPKM, >0.980 among samples of the same condition (Figure S1B).

124 472 *iMUTE* upregulated genes and 818 downregulated genes were extracted after q  
125 value =0.05 cutoff and Log<sub>2</sub> FC >0.5 (Figure 1F, Table S1). The Gene Ontology (GO) categories  
126 for the *iMUTE* upregulated genes are overwhelmingly specific to cell cycle, cell division, and  
127 mitosis (CC+CD+Mitosis), including cell cycle (GO:00070429), cell division (GO:0051301), DNA  
128 replication (GO:0006260), and mitotic nuclear division (GO:0000280). Highly enriched  
129 categories also include stomatal complex morphogenesis (GO:0010103), guard cell  
130 differentiation (GO:0010052) and microtubule-based movement (GO:0007018)(Figures 1G, S2,  
131 Table S2). In contrast, the GO enriched categories for *iMUTE* downregulated genes include  
132 response to auxin (GO:0009733), auxin polar transport (GO:0009926), and cell-wall loosening  
133 (GO:0009828)(Figures 1F, S2, Table S2). The clear categorizations of specific *iMUTE*-regulated  
134 genes indicate that MUTE promotes cell cycle/cell division and stomatal development, while  
135 repressing non-stomatal cell characters. A comparison of *iMUTE* differentially expressed genes  
136 (DEGs) with published fluorescent assisted cell-sorted (FACS) stomatal-lineage transcriptomes  
137 (Adrian et al., 2015) suggests that *iMUTE* DEGs share a similarity with those enriched in *MUTE*-  
138 expressing cells (Figures 1F, S1E). Low reproducibility among the FACS-sorted samples,  
139 however, limited the reliable comparisons (Figure S1D; see Methods).

140

## 141 **MUTE acts as a transcriptional switch for the stomatal patterning ligand-receptor** 142 **systems**

143 The closest paralog of *MUTE*, *SPCH* drives the initial entry into stomatal cell lineages, and its  
144 induced overexpression (*iSPCH*) results in epidermis with excessive asymmetric divisions  
145 (MacAlister et al., 2007; Pillitteri et al., 2007)(Figure 1E). To understand the extent of their  
146 shared and specific functions, we next compared their target genes. An induced *SPCH* (*iSPCH*)  
147 RNA-seq analysis was performed essentially at the same condition (8 hours of induction using

148 4-day-old seedlings) (Lau et al., 2014), thus we re-analyzed the published *iSPCH* data for direct  
149 comparison. 24% (113/472) of *iMUTE* upregulated genes are shared by *iSPCH* (Figure 1F, H,  
150 Table S1). To further correlate their shared transcriptional response to physical genome-wide  
151 SPCH binding locations (Lau et al., 2014), we analyzed the extent by which the promoters of the  
152 co-regulated genes are occupied by SPCH. 55% (62/113) of SPCH and MUTE co-upregulated  
153 genes are bound by SPCH, whereas only 22% (87/392) of SPCH-specific upregulated genes  
154 are bound by SPCH (Figure 1F, H, Table S1). Thus, extracting the transcriptional response  
155 shared by SPCH and MUTE highly enriches the selected set of the SPCH direct targets.

156 The most highly enriched GO-category for *iSPCH* and *iMUTE* shared co-upregulated  
157 genes is stomatal complex development, where 74% (14/19) of genes are SPCH-bound  
158 (Figures 1G, S2, Table S3). All eight *iMUTE*-up/*iSPCH*-up/SPCH-bound genes are known  
159 players of stomatal development: *TMM*, *ERL1*, *ERL2*, *BASL*, *POLAR*, and *POLAR-LIKE*,  
160 *SCREAM* (*SCRM*), and *HDG2* (Figure 1G, H, I, Table S3). *SCRM2* was also co-upregulated  
161 ( $\text{Log}_2=0.43$ ,  $\text{qVal}=3.94\text{E-}14$ )(Figure 1I, Table S1). A subsequent qRT-PCR analysis confirmed  
162 their induction (Figure S3). On the other hand, *CARBONIC ANHYDRASE1* (*CA1*), which  
163 mediates inhibition of stomatal development at elevated  $\text{CO}_2$  levels (Engineer et al., 2014), and  
164 *STOMAGEN* were repressed by both *iSPCH* and *iMUTE* (Figure 1I, Table S1).

165 To rule out the possibility that *iMUTE* causes a non-specific, promiscuous induction of  
166 SPCH targets, we further tested whether the promoters of these genes are indeed occupied by  
167 the functional MUTE protein expressed transiently during the meristemoids-to-GMC transition.  
168 For this purpose, chromatin-Immunoprecipitation (ChIP) assays were performed using  
169 Arabidopsis *mute* plants complemented by the functional MUTE-GFP protein driven by its own  
170 promoter (*proMUTE::MUTE-GFP*) using the *scrm-D* enabled background (Horst et al., 2015;  
171 Pillitteri et al., 2007; Qi et al., 2017). Indeed, direct associations of MUTE with the promoters of  
172 *TMM*, *SCRM*, as well as *BASL* and *POLAR* were detected, indicating that they are the *bona fide*,  
173 direct MUTE targets (Figures 1J, S4). The strong MUTE-GFP association was detected within

174 the location of known SPCH-binding sites, many possessing an E-box, which is a known bHLH  
175 binding sites (Figures 1K, S4, Table S3).

176 *EPF2* is a known direct target of SPCH (Horst et al., 2015; Lau et al., 2014). Although  
177 *iSPCH*, triggered >30 fold increase in *EPF2* expression, *iMUTE* directly repressed *EPF2* (-0.47,  
178  $qVal=1.50E-02$ )(Fig. 1I, Fig. S3). The ChIP assays detected the direct MUTE binding to the  
179 SPCH binding site within the *EPF2* promoter (Figures 1J, K, S4), indicating that MUTE changes  
180 transcription of *EPF2* via replacing SPCH. On the other hand, both *iSPCH* and *iMUTE* directly  
181 upregulate the receptors, *ERLs* and *TMM* (Figures 1I, J, K, S3, S4)(Horst et al., 2015; Lau et al.,  
182 2014; Qi et al., 2017). It is worth noting that *EPF1*, the sister peptide of *EPF2*, is perceived by  
183 *ERL1* and *TMM* to regulate MUTE activity during the GMC differentiation (Qi et al., 2017).  
184 Together, our findings suggest that MUTE acts as a transcriptional switch for the stomatal  
185 patterning ligand-receptor system, eliminating the earlier signal *EPF2* induced by SPCH, while  
186 maintaining the expression of shared receptors to perceive the later signal, *EPF1* (Figure 1L).

187

### 188 **MUTE directly upregulates cell-cycle genes driving the symmetric division of stomata**

189 *MUTE* terminates asymmetric division of meristemoids (Pillitteri et al., 2007). Unexpectedly, the  
190 most significantly *iMUTE*-upregulated genes belong to the combined GO-categories  
191 CC+CD+Mitotic, suggesting that MUTE is a potent inducer of cell division (Figures 1, F, G, S2,  
192 Table S2). Indeed, 46 genes belonging to the CC+CD+Mitotic categories are up by *iMUTE*,  
193 whereas only 2 genes are specifically up by *iSPCH*, which initiates stomatal-lineage divisions  
194 (Figures 1A, 2B, Table S3). Among the cell cycle genes (Figures 2A, S5), *iMUTE* strongly  
195 induced B-type Cyclin-Dependent Kinase genes *CDKB1;1*, and *CDKB2;1* as well as A-type  
196 cyclins, most notably *CYCA1;1*, *CYCA2;2*, and *CYCA2;3* (Figures 2B, S5). A subsequent ChIP  
197 analysis demonstrated that functional MUTE protein associates with the promoter regions of  
198 these cell-cycle regulator genes, indicating that they are direct MUTE targets (Figures 2C, D,  
199 S4). qRT-PCR time-course analyses confirmed the increase of *CDKB1;1*, *CYCA2;2*, and



200 *CYCA2;3* transcript levels ~4 hrs after *iMUTE* induction (Figure S5). *CDKB1;1* and *CYCA2s* are  
201 known to promote the GMC symmetric division (Boudolf et al., 2004; Xie et al., 2010) and,  
202 consistently, they are enriched in *MUTE*-expressing transcriptome (Adrian et al., 2015)(Figure  
203 2B). Our results suggest that *MUTE* promotes the SCD of GMCs through direct upregulation of  
204 *CDKB1;1* and *CYCA2s*.

205

206 ***CYCD5;1*, a direct *MUTE* target, accumulates transiently prior to the GMC symmetric**  
207 **division**

208 The previous stomatal-lineage transcriptome study reported *CYCD7;1* as a GMC-specific D-  
209 type cyclin (Adrian et al., 2015). However, our RNA-seq and time-course transcript analyses  
210 showed that *MUTE* induction has no effects on the expression of *CYCD7;1* ( $\text{Log}_2\text{FC} = 0.07$ ,  
211  $q\text{Val} = 1.00\text{E}+00$ ; Figures 2B, S5, Table S1). Therefore, *MUTE* does not activate *CYCD7;1*  
212 expression. In contrast, *iMUTE* strongly induces *CYCD5;1*, which has not been associated with  
213 stomatal development previously (Figure 2B). The functional *MUTE* protein robustly binds to the  
214 promoter of *CYCD5;1* (Figure 2C, D), and *iMUTE* rapidly induces *CYCD5;1* transcripts (Figure  
215 2E), demonstrating that *CYCD5;1* is a *MUTE* target. Consistently, *CYCD5;1* transcript levels  
216 were substantially reduced in the *mute* mutant background (Figures 2F, S4).

217 To understand the role of *CYCD5;1* in stomatal development, we generated Arabidopsis  
218 plants expressing *CYCD5;1*-GFP driven by its own promoter (*CYCD5;1pro::CYCD5;1-GFP*). A  
219 strong signal was detected within the nuclei of a GMC (Figure 2G, I). Consistently, *iMUTE* vastly  
220 increased the cells accumulating *CYCD5;1*-GFP (Figure 2H). The *CYCD5;1* promoter  
221 possesses five E-boxes, 3 of which situate where the robust in vivo *MUTE*-binding is detected  
222 (Figure 1C, D; Amplicon a). Deletion of the 3 E-boxes diminished though not abolished the GFP  
223 signals in meristemoids (Figure 1J), supporting that *MUTE* upregulates *CYCD5;1* via direct  
224 binding to its promoter.

225 To address the accumulation dynamics of *CYCD5;1* during stomatal differentiation, we  
226 next performed time-lapse live imaging using the double transgenic lines expressing *CYCD5;1*-  
227 GFP and plasma-membrane RFP (Figure 3A; Movie S1). *CYCD5;1*-GFP accumulates in the  
228 nucleus of a meristemoid within 3-4 hrs ( $3.3 \pm 1.4$  hrs, n=25) after the last asymmetric division,  
229 reaches maximum ~10 hrs ( $10.6 \pm 4.1$  hrs, n=26), and disappears ~8 hrs ( $7.9 \pm 1.1$  hrs, n=28) in  
230 prior to the symmetric division (Figure 3A, Movie S1). Consistent with our finding that MUTE  
231 directly activates *CYCD5;1* expression, functional MUTE-GFP accumulates in the nucleus of a  
232 meristemoid ~1.5 hrs ( $1.6 \pm 0.4$  hrs, n=25) after the last asymmetric division, thus preceding the  
233 accumulation of *CYCD5;1*-GFP (Figure 3B, Movie S2). Functional FAMA-GFP, which restricts  
234 the SCD, appears ~3.5 hrs ( $3.3 \pm 0.4$  hrs n=25) prior to the symmetric division (Fig 3C, Movie  
235 S3). Together, our time-lapse studies elucidate the in vivo dynamics of *CYCD5;1* within the  
236 narrow developmental window between MUTE and FAMA expression, suggesting its role in the  
237 GMC symmetric division.

238

### 239 ***CYCD5;1* is sufficient to trigger symmetric division-like divisions of arrested *mute*** 240 **meristemoids**

241 To address whether *CYCD5;1* expressed in the meristemoids is sufficient for the symmetric  
242 division in the absence of *MUTE*, we expressed *CYCD5;1* driven by the *MUTE* promoter into  
243 *mute* null mutant background (Figure 3D-I). The *mute* meristemoids undergo several rounds of  
244 spiral asymmetric divisions and arrest (Pillitteri et al., 2007)(Figure 3D, E). Strikingly,  
245 *MUTEpro::CYCD5;1* triggered occasional aberrant divisions of arrested *mute* meristemoid  
246 (Figure 3F-I, pink brackets). These aberrant divisions are in parallel or perpendicular  
247 orientations (Figure 3G-I, pink arrowheads), resembling to GMC-tumors seen in *fama* (Ohashi-  
248 Ito and Bergmann, 2006). Therefore, the expression of *MUTEpro::CYCD5;1* alone could drive  
249 symmetric-cell-division-like divisions of arrested *mute* meristemoids. None of these aberrantly-

250 divided tumors differentiated into stomata, consistent with the notion that other MUTE target  
251 genes are necessary for guard cell differentiation programs.

252

253 ***FAMA* and *FLP*, which restrict the symmetric division, are also direct MUTE targets**

254 *FAMA* and *FLP* restrict the SCD of a GMC through direct binding to the promoters of *CDKB1;1*  
255 (Hachez et al., 2011; Xie et al., 2010). In addition, *FLP* directly suppresses *CDKA1;1* expression  
256 (Xie et al., 2010; Yang et al., 2014). It remains unknown, however, what triggers their  
257 expressions. To address this question, we investigated the regulatory relationships of MUTE  
258 with *FLP* and *FAMA*. Our RNA-seq analysis identified both *FAMA* and *FLP* as *iMUTE*-specific  
259 upregulated genes, not upregulated by *iSPCH* (Figure 1I, Table S1). Both *FAMA* and *FLP*  
260 expressions are induced at around 8 hours after the *iMUTE* induction (Figures 4A; S3), slightly  
261 delayed from early stomatal genes and cell-cycle genes (Figures S3, S5). The *FAMA-GFP*  
262 signal was not detected in the *mute* epidermis (Figure 4B). On the other hand, the previously-  
263 reported *FLP* reporter, *FLPpro::GUS-GFP* (Lai et al., 2005), exhibited a basal expression  
264 throughout leaf epidermis with stronger signals in GMCs (Figure 4B). The basal *FLP* reporter  
265 signal persisted in arrested *mute* meristemoids (Figure 4B). Consistently, in *mute*, *FAMA*  
266 transcripts are at a detection limit whereas *FLP* transcripts were substantially reduced yet  
267 detectable (Figures 4C, S4). Thus, MUTE is absolutely required for *FAMA* expression, while  
268 MUTE boosts *FLP* expression during the GMC transition.

269 We subsequently tested whether *FAMA* and *FLP* are direct MUTE targets. ChIP  
270 experiments with MUTE-GFP detected strong signals at the *FAMA* and *FLP* promoters,  
271 overlapping with the regions of known SPCH binding peaks (Figures 4D,E, S4). Note, however,  
272 that *iSPCH* does not upregulate their expressions (Figure 1F, Table S1), suggesting that MUTE  
273 takes over the binding sites from SPCH and, in this case, activates the expression of *FAMA* and  
274 *FLP* to achieve stomatal differentiation.

275

276 **Incoherent type 1 feed forward loop (I1-IFF) ensuring the single symmetric cell division**

277 Our study revealed that MUTE directly upregulates both cell cycle regulators that positively drive  
278 SCD and transcription factors that negatively regulate SCD via direct repression of the cell-cycle  
279 genes. In the field of network dynamics and behaviors, the MUTE-driven transcriptional network  
280 motif represents a typical Incoherent Type I Feed-Forward Loop (I1-FFL) constituted by the  
281 three nodes, X, Y, and Z (Mangan and Alon, 2003). Here, MUTE (X) situates at the top of the  
282 network, which upregulates both *FAMA/FLP* (Y) as well as *CDKs/CYCs* (Z), whereas FAMA and  
283 FLP (Y) directly repress *CDKs/CYCs* (Z)(Figure 5A). The I1-FFL is known to produce a single  
284 highly-tuned pulse of output Z (Mangan and Alon, 2003), in this case the cell-cycle regulators.  
285 To elucidate if the I1-FFL orchestrated by MUTE is necessary and sufficient for the transient  
286 expressions and activities of the network output Z (*CDKs/CYCs*) during stomatal development,  
287 we took both mathematical modeling and experimental approaches.

288 Mathematical modeling of MUTE, FAMA/FLP and *CDKs/CYCs* faithfully reproduced the  
289 generation of single pulse of *CDKs/CYCs* observed *in vivo* (Figure 5B). We aimed for a minimal  
290 component modeling, which is qualitatively equivalent to three-component I1-FFL. All the  
291 interactions are implemented by Hill kinetics as described in original model with modifications  
292 (Mangan and Alon, 2003). Detail of the model is described in Supplemental materials &  
293 methods section.

294 To address the importance of the I1-FFL, we break up the I1-FFL *in silico* and  
295 experimentally verifying the stomatal phenotype as an outcome. If a node Y turns on  
296 simultaneously as X, the modeling predicts the output peak Z would decline to a sub-threshold  
297 level (Figure 5C). To test this prediction experimentally, *FAMA* as well as *FLP* were expressed  
298 precociously during the meristemoid-to-GMC transition driven by the *MUTE* promoter (Figure  
299 5E-G). Both *MUTE<sub>pro</sub>::FLP* and *MUTE<sub>pro</sub>::FAMA* conferred differentiation of single-celled  
300 stomata (~20% and ~88%, respectively), expressing mature GC GFP marker (Figure 5E-G).  
301 The phenotype highly resembles that of the dominant-negative *CDKB1;1* and *CDKA1;1* as well

302 as higher-order loss-of-function mutants of CDKB1s and CYCAs (Boudolf et al., 2004; Yang et  
303 al., 2014). In contrast, the previous report found no stomatal phenotype in *FLP* overexpressors  
304 (Lai et al., 2005). Our finding that *MUTE<sub>pro</sub>::FLP* triggers differentiation of single-celled stomata  
305 underscores the importance of specific cell type or developmental windows for *FLP* to function.

306 We next performed both simulation and experiments to break down the I1-FFL by  
307 turning on Z (*CDKs/CYCs*) simultaneously as X (*MUTE*), in which case the repression by Y  
308 (*FLP/FAMA*) would be too late to properly terminate the activity of Z (Figure 5H, I). We predicted  
309 that the repression by *FLP/FAMA* may be too strong to convincingly unravel the perturbed  
310 effects of *CYCD5;1*. We thus introduced *MUTE<sub>pro</sub>::CYCD5;1* into *fama* mutant background,  
311 which gives rise to GMC tumors with extra symmetric divisions (Figure 1J)(Ohashi-Ito and  
312 Bergmann, 2006). A precocious expression of *CYCD5;1* at the onset of *MUTE* expression  
313 triggered striking supernumerary divisions of *fama* GMC-like tumors, vastly increasing the  
314 number of cells per tumor (Figure 5J, K). The finding corroborates with the mathematical  
315 modeling (Figure 5H).

316 As shown in Figure 3A, *CYCD5;1* disappears before the SCD of GMCs. To further  
317 address whether *FAMA* and *FLP* are required for the repression of *CYCD5;1*, we introduced  
318 *CYCD5;1*-GFP into *fama* and *flp-7* mutant backgrounds. Indeed, strong *CYCD5;1*-GFP signals  
319 are accumulated in symmetrically-dividing GMC tumors (Figure 5L). Combined, both  
320 mathematical modeling and experimental perturbations demonstrate the critical, direct role of  
321 *MUTE* in orchestrating the regulatory feed-forward loop ensuring the one symmetric division to  
322 create a stoma.

323

### 324 **Saturation and noise in ectopic *iMUTE* could flip the outcome of I1-FFL**

325 Our mathematical and experimental analyses revealed that regulatory motif controlled by *MUTE*  
326 enables a fast response time and transient upregulation of cell-cycle regulator gene expression.  
327 Previous studies reported that *MUTE* overexpression confers constitutive stomatal

328 differentiation in the cotyledon/leaf epidermis (MacAlister et al., 2007; Pillitteri et al., 2007;  
329 Trivino et al., 2013). However, through characterizing of our model parameters, we found that  
330 MUTE has to regulate *FAMA/FLP* much more tightly to ensure the single SCD under *iMUTE*  
331 overexpression (Figure 6A, B). Here, sustained *iMUTE in silico* limits the possible range of  
332 strong CDKs/CYCs activation by MUTE. On the other hand, *iMUTE* overexpression causes  
333 stronger activation of *FAMA/FLP*. In the parameter sets we employed, this could lead to faster  
334 decline of CDKs/CYCs, diminishing the peak below a threshold to trigger the SCD. Taking into  
335 account the modeling results that predict the dysregulation of the MUTE-orchestrated I1-FFL,  
336 we sought to revisit the *MUTE* overexpression phenotype.

337         Indeed, careful observations of *iMUTE* epidermis revealed that, within the sheet of  
338 stomata-only epidermis, occasionally formed are singular GCs, *fama*-like GMC tumors, and  
339 stomata made with a trio or quartet of GCs surrounding a pore (Figure 6C-G). The singular GCs  
340 (Figure 6C,F,G, pink asterisks) are the hallmark of *FAMA* overexpression (Ohashi-Ito and  
341 Bergmann, 2006), whereas the excessive symmetric divisions (Figure 6C,G, orange and white  
342 brackets) imply the loss of *FAMA* or *FLP* activities. Conversely, 3-4 celled stomata (Figure 6C,D,  
343 white arrowheads) are the signature of ectopic activities of cell cycle genes in GMCs (Adrian et  
344 al., 2015; Yang et al., 2014). Mature GC GFP marker was expressed in a subset of GCs in 3-4  
345 celled stomata (Figure 6E, cyan arrowheads) and likewise in a subset of singular GCs (Figure  
346 6F, white asterisks). Thus, regardless of developmental outcome as singular GCs or 3-4 celled  
347 stomata, *iMUTE* can trigger eventual GC differentiation. The supernumerary GMCs expressed  
348 stomatal-lineage GFP marker, *TMMpro::GUS-GFP* (Figure 6G, white bracket), corroborating  
349 their identity.

350

351

352 **Discussion**

353 This study identifies the complete inventories of early MUTE-responsive genes. The comparison  
354 of SPCH and MUTE shared and unique targets revealed how MUTE switches the cell-cell  
355 signaling from stomatal lineage initiation to commitment. The work further unraveled that MUTE  
356 directly induces the expression of both the cell cycle regulators and their transcriptional  
357 repressors, thereby orchestrating the I1-FFL to generate the robust single symmetric division  
358 event to create functional stomata.

359

360 **Logic of cell-state transition by sequential actions of bHLH proteins**

361 How could later-acting stomatal bHLHs switch the precursor state from their earlier acting  
362 sisters? Our study revealed that MUTE binds to the SPCH-binding sites of the shared target  
363 genes and takes over their lineage-specific expressions, while repressing the earlier-acting  
364 gene *EPF2* to switch cell-cell signaling circuits (Figure 1L). The regulatory modules of stomatal  
365 differentiation resemble that of myogenesis in animals, where myogenic bHLHs; Myf5, MyoD,  
366 Myogen and MRF4 sequentially direct lineage specification, proliferation, and differentiation  
367 (Putarjunan and Torii, 2016; Tapscott, 2005). Extensive ChIP-seq studies of Myf5 and MyoD  
368 have shown that these two myogenic bHLHs bind to the nearly identical target sites genome-  
369 wide. However, unlike Myf5, MyoD promotes strong transcriptional activation via Pol II  
370 recruitment, suggesting that their functional specificities lie in their transcriptional activities  
371 (Conerly et al., 2016). Each stomatal bHLH possesses a unique motif signifying its function  
372 (Davies and Bergmann, 2014). Interestingly, overexpression of SPCH without the MAP kinase  
373 target domain or truncated FAMA lacking the N-terminal activation domain phenocopies MUTE  
374 activities (Lampard et al., 2008; Ohashi-Ito and Bergmann, 2006), suggesting that these  
375 additional modules prevent the functional interference among the three bHLHs.

376 It is known that *SPCH*, *MUTE*, and *FAMA* expressions are tightly regulated by the  
377 epigenetic mechanisms (Lee et al., 2014; Matos et al., 2014). The local chromatin state may

378 explain why some targets (e.g. *TMM*, *SCRM*) are immediately induced by *MUTE* while others  
379 (e.g. *FAMA*) delay for ~8 hrs. It could also explain the previous report that the ability for *MUTE*  
380 to induce stomatal differentiation becomes restricted as plants age (Trivino et al., 2013). In  
381 myogenesis, both Myf5 and MyoD recruit histone acetyltransferase to alter the epigenetic  
382 landscape at their target sites (Cao et al., 2010; Conerly et al., 2016). It would be interesting to  
383 test in future whether local and global epigenetic landscapes are regulated by each stomatal  
384 bHLH.

385

### 386 **MUTE as a potent inducer of cell division**

387 Our study unraveled that MUTE is a potent inducer of cell cycle genes (Figure 2). MUTE  
388 strongly upregulates *CDKBs* (*CDKB1;1* and *CDKB1;2*) and *CYCA2s* (*CYCA2;2*, *CYCA2;3*) that  
389 promote GMC symmetric divisions (Boudolf et al., 2004; Xie et al., 2010). *CDKBs-CYCA2s*  
390 complexes are known to regulate S/G2 phase, but do not drive the cell cycle entry. Our work  
391 further identified *CYCD5;1* as a D1-cyclin promoting the symmetric division. *CYCD5;1* is known  
392 to partner with *CDKA1;1* (Boruc et al., 2010), which is not likely a MUTE target (Figures 2, S5).  
393 Because G1/S transition is a rate-limiting step, once *CYCD5;1* expression is induced, basal  
394 levels of *CDKs* and *G2/M cyclins* in *mute* may be sufficient to execute the symmetric-division-  
395 like cell division. Time-lapse imaging shows that *CYCD5;1* peaks and disappears ~8 hrs before  
396 the symmetric division prior to *CDKB1;1* accumulation (Figure S6). The sequential peaks of  
397 *CYCD5;1* followed by *CDKB1;1* are consistent with their roles in G1/S and G2/M transitions,  
398 respectively.

399 It is worth noting that modest enrichments of *CDKB1;1* and *CYCA2;3* were reported in  
400 *scrm-D mute* mutant, which does not execute the symmetric division (Pillitteri et al., 2011).  
401 Because *CDKB1;1* and *CYCA2s* suppress endocycles (Boudolf et al., 2009), it is possible that  
402 these cell cycle genes exhibit background-level expressions in the MUTE-independent manner,  
403 which may be crucial for preventing the endoreduplication of stomatal-lineage cells. In this



404 scenario, the primary role of MUTE is to boost their timely expressions above the threshold level  
405 in order to drive the symmetric division. In this regard, it is interesting that *CYCD5;1* has been  
406 reported as a candidate quantitative trait gene for endoreduplication in *Arabidopsis* natural  
407 accessions (Sterken et al., 2012). In any event, *Arabidopsis* MUTE as a potent inducer of cell  
408 division accords with the role for its mobile *Brachypodium* ortholog, *BdMUTE*, in promoting the  
409 subsidiary cell division (Raissig et al., 2017). Whether *BdMUTE* (or other grass MUTE  
410 orthologs) directly drives the symmetric division of grass stomata is a future question.

411

### 412 **I1-FFL orchestrated by MUTE drives the single symmetric division to create stomata**

413 Our study unraveled that MUTE directly activates the expressions of cell-cycle genes and the  
414 direct repressors of the cell cycle genes. Furthermore, our modeling showed that the I1-FFL  
415 orchestrated by MUTE can trigger a single pulse of gene expression, in this case the cell cycle  
416 genes, within the narrow developmental windows encompassed by MUTE and *FAMA/FLP*  
417 (Figure 5). Importantly, the single pulse is much more robustly generated by the endogenous,  
418 pulsed *MUTE* expression than for saturated and sustained one (Figure 6). The I1-FFL is known  
419 to function as a pulse generator (Basu et al., 2004; Mangan and Alon, 2003): the circuit can  
420 generate a pulse output even under sustained input. This explains why sustained *iMUTE*  
421 overexpression still largely produces ‘normal’ stomata with paired GCs. Since *MUTE* expression  
422 window is limited in the wild type, theoretically, the simple linear circuit could be implemented for  
423 a pulse output. However, the I1-FFL would hold advantages for this biological context. The I1-  
424 FFL can accelerate the response time (Mangan and Alon, 2003), thus allowing MUTE to  
425 achieve the single division event concomitantly with stomatal differentiation. Our model is  
426 consistent with a previous report for a step input (Goentoro et al., 2009) such that a delay in the  
427 response of *FAMA/FLP* to MUTE enabled the amplitude and duration of *CDKs/CYC*s activation  
428 to be increased, which contributes to the sharp and high peak. This emphasizes the importance  
429 of the direct control of *FAMA/FLP* by MUTE to achieve such coordination. Recently, the I1-FFL

430 was implicated in transcriptional control of root Casparian strip differentiation (Fernandez-  
431 Marcos et al., 2017). Thus, plants may use I1-FFL for critical cell-fate decision-making  
432 processes in broader contexts.

433

#### 434 **Acknowledgements**

435 We thank L. Pillitteri for generating *iMUTE* lines; E. Lee, F. Sack, S. Vanneste, D. Inzé, L. de  
436 Vylder, and J. Garrick for mutants and reporter lines; C. Zheng for plant care; M. Ito for expert  
437 comments on the manuscript. The work was supported by the US National Science Foundation  
438 (MCB-0855659) and the Gordon and Betty Moore Foundation (GBMF-3035) to K.U.T, who  
439 acknowledges support from HHMI and University of Washington.

440

#### 441 **Author contributions**

442 Conceived the project, K.U.T.; designed experiments, S.K.H. and K.U.T.; performed  
443 experiments, S.K.H., X.Q., J.H.D., K.L.M., E.K. K.U.T.; performed bioinformatics analysis, S.K.H.  
444 and T.A.E.; analyzed data, S.K.H, X.Q., E.K., T.A.E, and K.U.T.; performed mathematical  
445 modeling; K.S., T.M.; Wrote the paper, K.U.T; All authors contributed to finalizing the paper.

446

#### 447 **Declaration of Interests**

448 The authors declare no competing interests.

449

450 **References**

- 451
- 452 Adrian, J., Chang, J., Ballenger, C.E., Bargmann, B.O., Allassimone, J., Davies, K.A., Lau, O.S.,  
453 Matos, J.L., Hachez, C., Lanctot, A., *et al.* (2015). Transcriptome dynamics of the stomatal  
454 lineage: birth, amplification, and termination of a self-renewing population. *Dev Cell* **33**, 107-118.
- 455 Basu, S., Mehreja, R., Thiberge, S., Chen, M.T., and Weiss, R. (2004). Spatiotemporal control  
456 of gene expression with pulse-generating networks. *Proc Natl Acad Sci U S A* **101**, 6355-6360.
- 457 Boruc, J., Inze, D., and Russinova, E. (2010). A high-throughput bimolecular fluorescence  
458 complementation protein-protein interaction screen identifies functional Arabidopsis CDKA/B-  
459 CYCD4/5 complexes. *Plant Signal Behav* **5**, 1276-1281.
- 460 Boudolf, V., Barroco, R., Engler Jde, A., Verkest, A., Beeckman, T., Naudts, M., Inze, D., and  
461 De Veylder, L. (2004). B1-type cyclin-dependent kinases are essential for the formation of  
462 stomatal complexes in Arabidopsis thaliana. *Plant Cell* **16**, 945-955.
- 463 Boudolf, V., Lammens, T., Boruc, J., Van Leene, J., Van Den Daele, H., Maes, S., Van Isterdael,  
464 G., Russinova, E., Kondorosi, E., Witters, E., *et al.* (2009). CDKB1;1 forms a functional complex  
465 with CYCA2;3 to suppress endocycle onset. *Plant Physiol* **150**, 1482-1493.
- 466 Cao, Y., Yao, Z., Sarkar, D., Lawrence, M., Sanchez, G.J., Parker, M.H., MacQuarrie, K.L.,  
467 Davison, J., Morgan, M.T., Ruzzo, W.L., *et al.* (2010). Genome-wide MyoD binding in skeletal  
468 muscle cells: a potential for broad cellular reprogramming. *Dev Cell* **18**, 662-674.
- 469 Chater, C.C.C., Caine, R.S., Fleming, A.J., and Gray, J.E. (2017). Origins and Evolution of  
470 Stomatal Development. *Plant Physiol* **174**, 624-638.
- 471 Conerly, M.L., Yao, Z., Zhong, J.W., Groudine, M., and Tapscott, S.J. (2016). Distinct Activities  
472 of Myf5 and MyoD Indicate Separate Roles in Skeletal Muscle Lineage Specification and  
473 Differentiation. *Dev Cell* **36**, 375-385.
- 474 Davies, K.A., and Bergmann, D.C. (2014). Functional specialization of stomatal bHLHs through  
475 modification of DNA-binding and phosphoregulation potential. *Proc Natl Acad Sci U S A* **111**,  
476 15585-15590.
- 477 De Veylder, L., Beeckman, T., and Inze, D. (2007). The ins and outs of the plant cell cycle. *Nat*  
478 *Rev Mol Cell Biol* **8**, 655-665.
- 479 Engineer, C.B., Ghassemian, M., Anderson, J.C., Peck, S.C., Hu, H., and Schroeder, J.I. (2014).  
480 Carbonic anhydrases, EPF2 and a novel protease mediate CO control of stomatal development.  
481 *Nature*.
- 482 Fernandez-Marcos, M., Desvoyes, B., Manzano, C., Liberman, L.M., Benfey, P.N., Del Pozo,  
483 J.C., and Gutierrez, C. (2017). Control of Arabidopsis lateral root primordium boundaries by  
484 MYB36. *New Phytol* **213**, 105-112.
- 485 Goentoro, L., Shoval, O., Kirschner, M.W., and Alon, U. (2009). The incoherent feedforward  
486 loop can provide fold-change detection in gene regulation. *Mol Cell* **36**, 894-899.
- 487 Hachez, C., Ohashi-Ito, K., Dong, J., and Bergmann, D.C. (2011). Differentiation of Arabidopsis  
488 guard cells: analysis of the networks incorporating the basic helix-loop-helix transcription factor,  
489 FAMA. *Plant Physiol* **155**, 1458-1472.
- 490 Han, S.K., and Torii, K.U. (2016). Lineage-specific stem cells, signals and asymmetries during  
491 stomatal development. *Development* **143**, 1259-1270.
- 492 Hara, K., Kajita, R., Torii, K.U., Bergmann, D.C., and Kakimoto, T. (2007). The secretory peptide  
493 gene EPF1 enforces the stomatal one-cell-spacing rule. *Genes Dev* **21**, 1720-1725.
- 494 Hara, K., Yokoo, T., Kajita, R., Onishi, T., Yahata, S., Peterson, K.M., Torii, K.U., and Kakimoto,  
495 T. (2009). Epidermal cell density is auto-regulated via a secretory peptide, EPIDERMAL  
496 PATTERNING FACTOR2 in Arabidopsis leaves. *Plant Cell Physiol* **50**, 1019-1031.
- 497 Horst, R.J., Fujita, H., Lee, J.S., Rychel, A.L., Garrick, J.M., Kawaguchi, M., Peterson, K.M., and  
498 Torii, K.U. (2015). Molecular Framework of a Regulatory Circuit Initiating Two-Dimensional  
499 Spatial Patterning of Stomatal Lineage. *PLoS Genet* **11**, e1005374.

500 Hunt, L., and Gray, J.E. (2009). The signaling peptide EPF2 controls asymmetric cell divisions  
501 during stomatal development. *Curr Biol* 19, 864-869.

502 Kanaoka, M.M., Pillitteri, L.J., Fujii, H., Yoshida, Y., Bogenschutz, N.L., Takabayashi, J., Zhu,  
503 J.K., and Torii, K.U. (2008). SCREAM/ICE1 and SCREAM2 specify three cell-state transitional  
504 steps leading to Arabidopsis stomatal differentiation. *Plant Cell* 20, 1775-1785.

505 Kono, A., Umeda-Hara, C., Adachi, S., Nagata, N., Konomi, M., Nakagawa, T., Uchimiya, H.,  
506 and Umeda, M. (2007). The Arabidopsis D-type cyclin CYCD4 controls cell division in the  
507 stomatal lineage of the hypocotyl epidermis. *Plant Cell* 19, 1265-1277.

508 Lai, L.B., Nadeau, J.A., Lucas, J., Lee, E.K., Nakagawa, T., Zhao, L., Geisler, M., and Sack, F.D.  
509 (2005). The Arabidopsis R2R3 MYB proteins FOUR LIPS and MYB88 restrict divisions late in  
510 the stomatal cell lineage. *Plant Cell* 17, 2754-2767.

511 Lampard, G.R., Macalister, C.A., and Bergmann, D.C. (2008). Arabidopsis stomatal initiation is  
512 controlled by MAPK-mediated regulation of the bHLH SPEECHLESS. *Science* 322, 1113-1116.

513 Lau, O.S., and Bergmann, D.C. (2012). Stomatal development: a plant's perspective on cell  
514 polarity, cell fate transitions and intercellular communication. *Development* 139, 3683-3692.

515 Lau, O.S., Davies, K.A., Chang, J., Adrian, J., Rowe, M.H., Ballenger, C.E., and Bergmann, D.C.  
516 (2014). Direct roles of SPEECHLESS in the specification of stomatal self-renewing cells.  
517 *Science* 345, 1605-1609.

518 Lee, E., Lucas, J.R., Goodrich, J., and Sack, F.D. (2014). Arabidopsis guard cell integrity  
519 involves the epigenetic stabilization of the FLP and FAMA transcription factor genes. *Plant J* 78,  
520 566-577.

521 Lee, J.S., Kuroha, T., Hnilova, M., Khatayevich, D., Kanaoka, M.M., McAbee, J.M., Sarikaya, M.,  
522 Tamerler, C., and Torii, K.U. (2012). Direct interaction of ligand-receptor pairs specifying  
523 stomatal patterning. *Genes Dev* 26, 126-136.

524 MacAlister, C.A., Ohashi-Ito, K., and Bergmann, D.C. (2007). Transcription factor control of  
525 asymmetric cell divisions that establish the stomatal lineage. *Nature* 445, 537-540.

526 Mangan, S., and Alon, U. (2003). Structure and function of the feed-forward loop network motif.  
527 *Proc Natl Acad Sci U S A* 100, 11980-11985.

528 Matos, J.L., Lau, O.S., Hachez, C., Cruz-Ramirez, A., Scheres, B., and Bergmann, D.C. (2014).  
529 Irreversible fate commitment in the Arabidopsis stomatal lineage requires a FAMA and  
530 RETINOBLASTOMA-RELATED module. *Elife* 3.

531 Nadeau, J.A., and Sack, F.D. (2002). Control of stomatal distribution on the Arabidopsis leaf  
532 surface. *Science* 296, 1697-1700.

533 Ohashi-Ito, K., and Bergmann, D.C. (2006). Arabidopsis FAMA controls the final  
534 proliferation/differentiation switch during stomatal development. *Plant Cell* 18, 2493-2505.

535 Peterson, K.M., Rychel, A.L., and Torii, K.U. (2010). Out of the mouths of plants: the molecular  
536 basis of the evolution and diversity of stomatal development. *Plant Cell* 22, 296-306.

537 Pillitteri, L.J., Bogenschutz, N.L., and Torii, K.U. (2008). The bHLH protein, MUTE, controls  
538 differentiation of stomata and the hydathode pore in Arabidopsis. *Plant Cell Physiol* 49, 934-943.

539 Pillitteri, L.J., Peterson, K.M., Horst, R.J., and Torii, K.U. (2011). Molecular profiling of stomatal  
540 meristemoids reveals new component of asymmetric cell division and commonalities among  
541 stem cell populations in Arabidopsis. *Plant Cell* 23, 3260-3275.

542 Pillitteri, L.J., Sloan, D.B., Bogenschutz, N.L., and Torii, K.U. (2007). Termination of asymmetric  
543 cell division and differentiation of stomata. *Nature* 445, 501-505.

544 Putarjuna, A., and Torii, K.U. (2016). Stomagenesis versus myogenesis: Parallels in intrinsic  
545 and extrinsic regulation of transcription factor mediated specialized cell-type differentiation in  
546 plants and animals. *Dev Growth Differ* 58, 341-354.

547 Qi, X., Han, S.K., Dang, J.H., Garrick, J.M., Ito, M., Hofstetter, A.K., and Torii, K.U. (2017).  
548 Autocrine regulation of stomatal differentiation potential by EPF1 and ERECTA-LIKE1 ligand-  
549 receptor signaling. *Elife* 6.

550 Raissig, M.T., Matos, J.L., Anleu Gil, M.X., Kornfeld, A., Bettadapur, A., Abrash, E., Allison, H.R.,  
551 Badgley, G., Vogel, J.P., Berry, J.A., *et al.* (2017). Mobile MUTE specifies subsidiary cells to  
552 build physiologically improved grass stomata. *Science* 355, 1215-1218.  
553 Scarth, G.W. (1932). Mechanism of the Action of Light and Other Factors on Stomatal  
554 Movement. *Plant Physiol* 7, 481-504.  
555 Scofield, S., Jones, A., and Murray, J.A. (2014). The plant cell cycle in context. *J Exp Bot* 65,  
556 2557-2562.  
557 Sterken, R., Kiekens, R., Boruc, J., Zhang, F., Vercauteren, A., Vercauteren, I., De Smet, L.,  
558 Dhondt, S., Inze, D., De Veylder, L., *et al.* (2012). Combined linkage and association mapping  
559 reveals CYCD5;1 as a quantitative trait gene for endoreduplication in Arabidopsis. *Proc Natl*  
560 *Acad Sci U S A* 109, 4678-4683.  
561 Tapscott, S.J. (2005). The circuitry of a master switch: MyoD and the regulation of skeletal  
562 muscle gene transcription. *Development* 132, 2685-2695.  
563 Trivino, M., Martin-Trillo, M., Ballesteros, I., Delgado, D., de Marcos, A., Desvoves, B., Gutierrez,  
564 C., Mena, M., and Fenoll, C. (2013). Timely expression of the Arabidopsis stoma-fate master  
565 regulator MUTE is required for specification of other epidermal cell types. *Plant J* 75, 808-822.  
566 Xie, Z., Lee, E., Lucas, J.R., Morohashi, K., Li, D., Murray, J.A., Sack, F.D., and Grotewold, E.  
567 (2010). Regulation of cell proliferation in the stomatal lineage by the Arabidopsis MYB FOUR  
568 LIPS via direct targeting of core cell cycle genes. *Plant Cell* 22, 2306-2321.  
569 Yang, K., Wang, H., Xue, S., Qu, X., Zou, J., and Le, J. (2014). Requirement for A-type cyclin-  
570 dependent kinase and cyclins for the terminal division in the stomatal lineage of Arabidopsis. *J*  
571 *Exp Bot* 65, 2449-2461.  
572  
573  
574

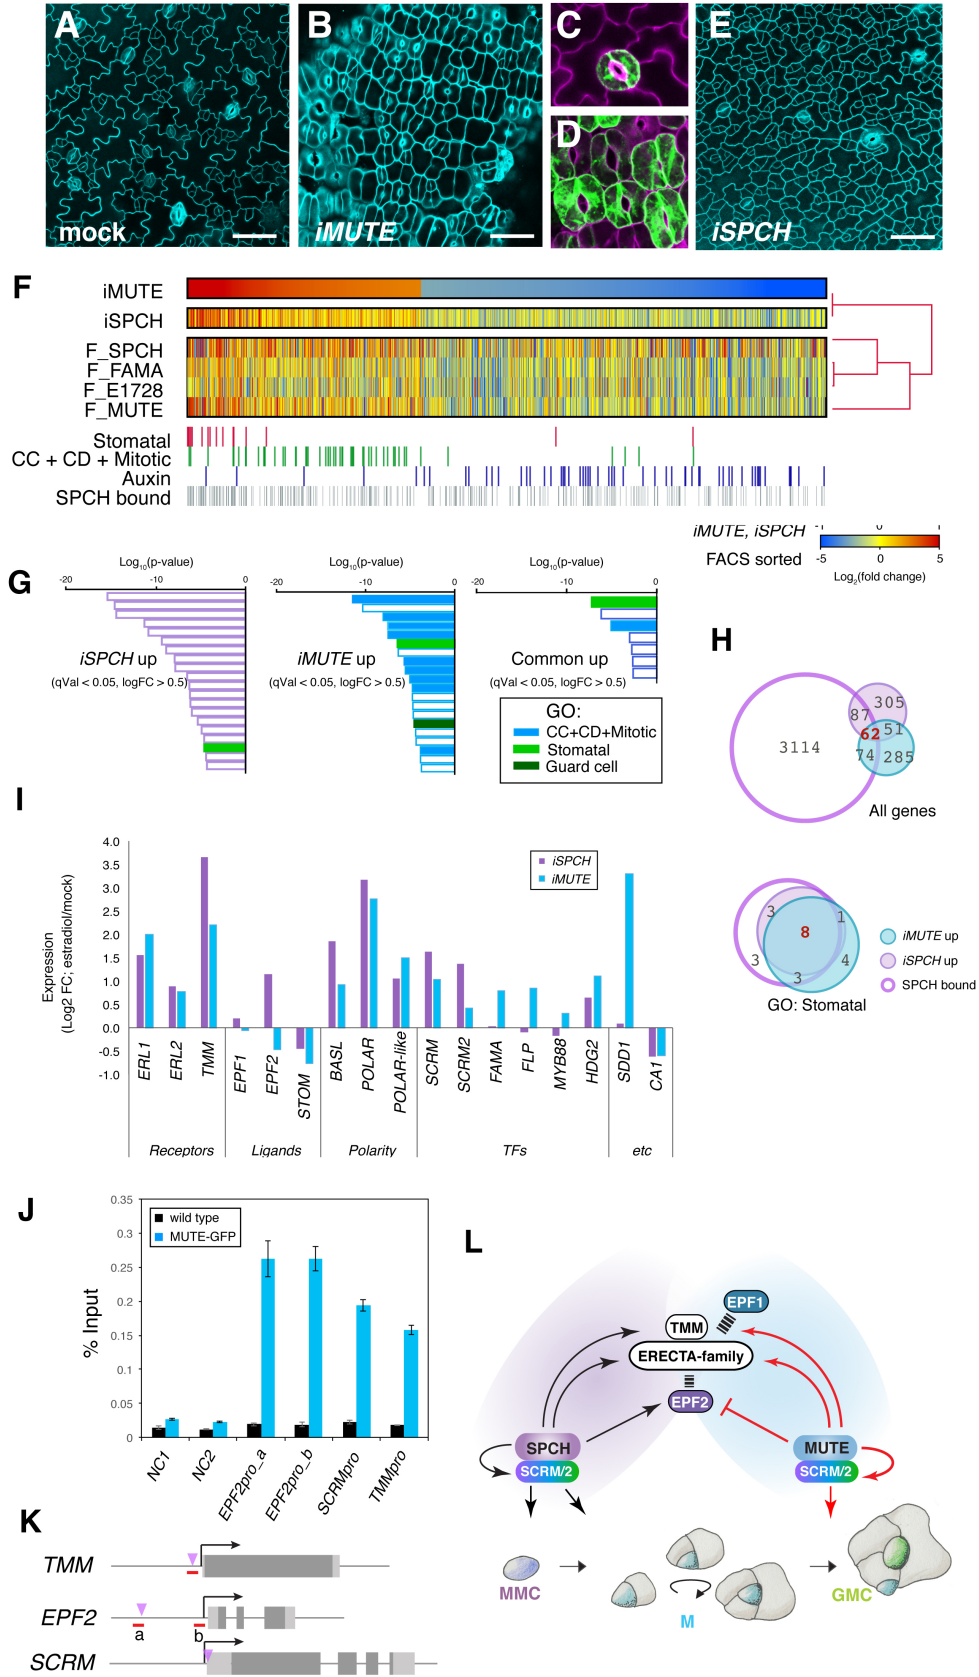

576 **Figure 1. Transcriptomic profiling of MUTE target genes reveals a framework of stomatal**  
577 **cell-state switch.**

578 (A-E) Epidermal phenotypes of 3-day-old seedlings carrying inducible *MUTE* construct, either  
579 mock treated (A, C) or estradiol-induced (*iMUTE*) in media (B, D). Mature stomata of mock (C)  
580 and *iMUTE* (D) cotyledon epidermis expressing GC GFP marker E994. Induced overexpression  
581 of *SPCH* (*iSPCH*) showing excessive epidermal cell divisions (E). Scale bars, 50  $\mu$ m.

582 (F) Heat map of *iMUTE* DEGs ( $\log_2$  FC  $\geq 0.5$  and  $\leq -0.5$ , respectively, q-val  $\leq 0.05$ ) by RNA-seq  
583 analysis. Their expression fold-changes by *iSPCH* (Lau et al., 2014) as well as in FACS-sorted  
584 stomatal-lineage cells (Adrian et al., 2015) are shown as heat maps below. Genes in GO  
585 categories: red, "stomatal"; green, "cell cycle, cell division and mitotic (CC+CD+Mitotic)"; blue,  
586 "auxin"; and gray, SPCH-bound according to published ChIP-seq data (Lau et al., 2014).

587 (G) GO categories of top *iSPCH* up, *iMUTE* up, and common up ( $\log_2$  fold change  $\geq 0.5$ , q-val  $\leq$   
588 0.05), ranked by p-values. Green, "stomatal"; blue, "CC+CD+Mitotic", and dark green, "guard  
589 cells". For complete lists, see Figure S2 and Table S2.

590 (H) Venn diagrams of *iMUTE*-up (light sky blue), *iSPCH*-up (lilac), and SPCH-bound genes  
591 (purple outline) for all genes (top) and for the combined GO categories "stomatal" (bottom).

592 (I) Expression FC of known stomatal regulators by *iMUTE* (blue) and *iSPCH* (purple).

593 (J) ChIP assays showing specific binding of functional MUTE-GFP at the promoter regions. NC,  
594 Negative Control; NC1, 5' intergenic region of *ACTIN2*; NC2, promoter region of *AGAMOUS*.  
595 Bars, average of three technical repeats. Error bars, s.e.m. See additional two biological  
596 replicates in Figure S4.

597 (K) Gene structures. Light gray rectangles, UTRs; dark gray rectangles, exons; arrows,  
598 transcriptional start sites; red line, amplicons; purple triangle, known SPCH binding sites (Lau et  
599 al., 2014).

600 (L) Updated model of stomatal cell-state switch by MUTE. See main text for detail.

601

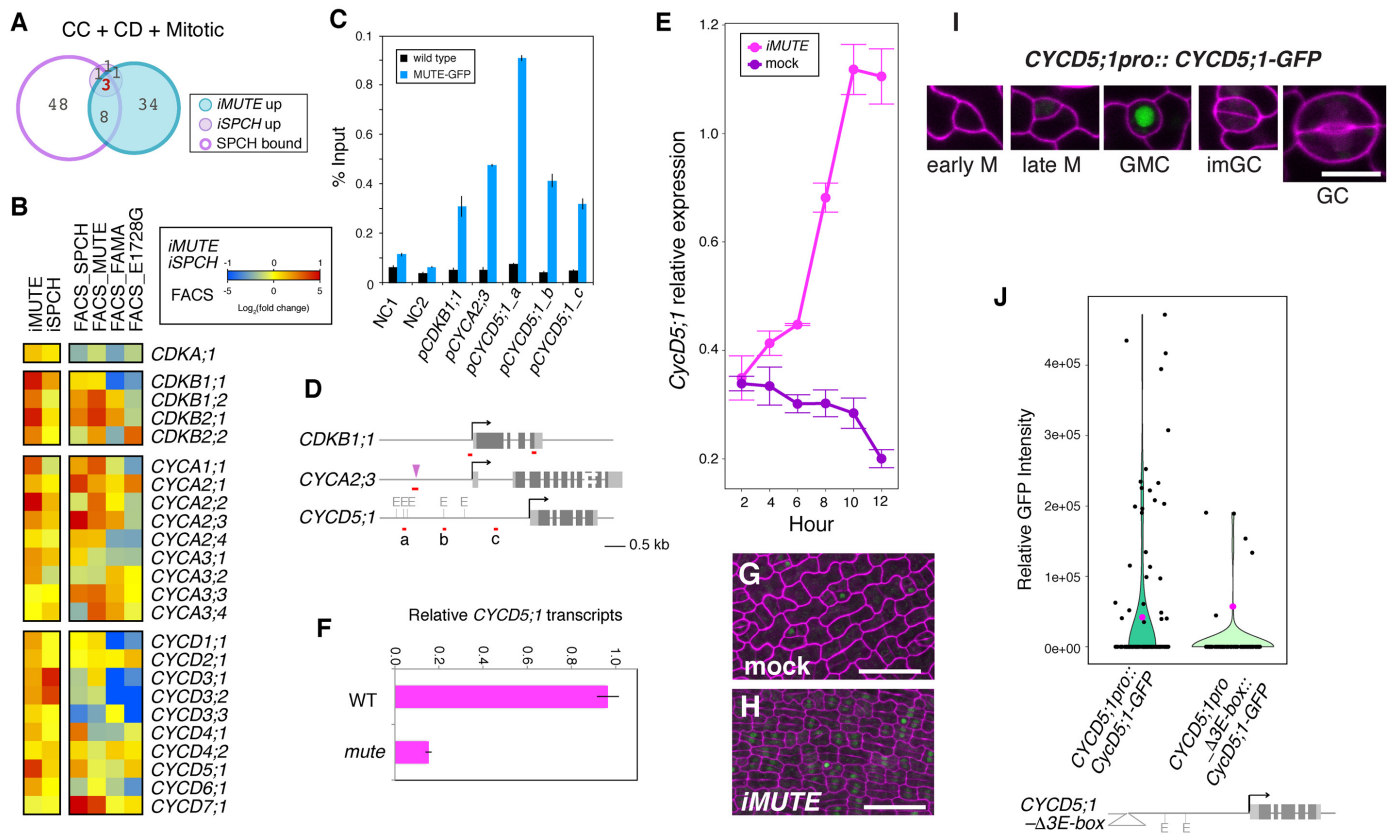

603

**Figure 2. Direct role of MUTE in promoting cell-cycle gene expression.**

604

(A) Venn diagrams of *iMUTE*-up (light sky blue), *iSPCH*-up (lilac), and SPCH-bound genes

605

(purple outline; left) for the combined GO categories CC+CD+Mitotic(right). For gene lists, see

606

Table S2. (B) Heat map showing expression ( $\text{Log}_2$  FC) of cell cycle genes by *iMUTE*, *iSPCH*,

607

and FACS-sorted stomatal-lineage cells.

608

(C) ChIP assays showing the binding of functional MUTE-GFP at the promoter regions. Bars,

609

average of three technical repeats. Error bars, s.e.m. See additional two biological replicates in

610

Figure S4.

611

(D) Diagrams of *CDKB1;1*, *CYCA2;3* and *CYCD5;1* loci. Light gray rectangles, UTRs; dark gray

612

rectangles, exons; arrows, transcriptional start sites; red line, amplicons; purple triangle, known

613

SPCH binding sites (Lau et al., 2014); E, E-boxes.



614 (E) *iMUTE* triggers rapid induction of *CYCD5;1* transcripts. Shown are time course of *CYCD5;1*  
615 relative expression by *iMUTE* vs. mock, normalized against *ACTIN* (*ACT2*). Dots, mean values  
616 of three technical replicates; error bars, s.d. For all three biological replicates, see Figure S5.  
617 (F) Relative *CYCD5;1* expression in 8-day-old wild-type (WT) and *mute* seedlings normalized  
618 against *ACT2*. Bars, mean of three technical replicates. Error bars, s.e.m. For additional two  
619 biological replicates, see Figure S5.  
620 (G and H) *iMUTE* triggers ectopic overexpression of *CYCD5;1-GFP* on developing epidermis.  
621 Mock (G) and *iMUTE* (H) for 40 hours of germination. Scale bars, 50  $\mu\text{m}$ .  
622 (I) *CYCD5;1pro::CYCD5;1-GFP* in stomatal lineage cells. Images are taken under the same  
623 magnification. Scale bar, 10  $\mu\text{m}$ .  
624 (J) Violin plots of relative GFP intensity within nuclei of meristemoids from 12-day-old seedlings  
625 expressing *CYCD5;1pro::CYCD5;1-GFP* (left; n=122) and *CYCD5;1pro\_Δ3E-box::CYCD5;1-*  
626 *GFP* (right; n=86), whereby the three E-boxes in the amplicon a (D) are removed (bottom).  
627 Black dots, values from individual nuclei; pink dots, means. p-value, Wilcoxon Rank Sum Test.  
628

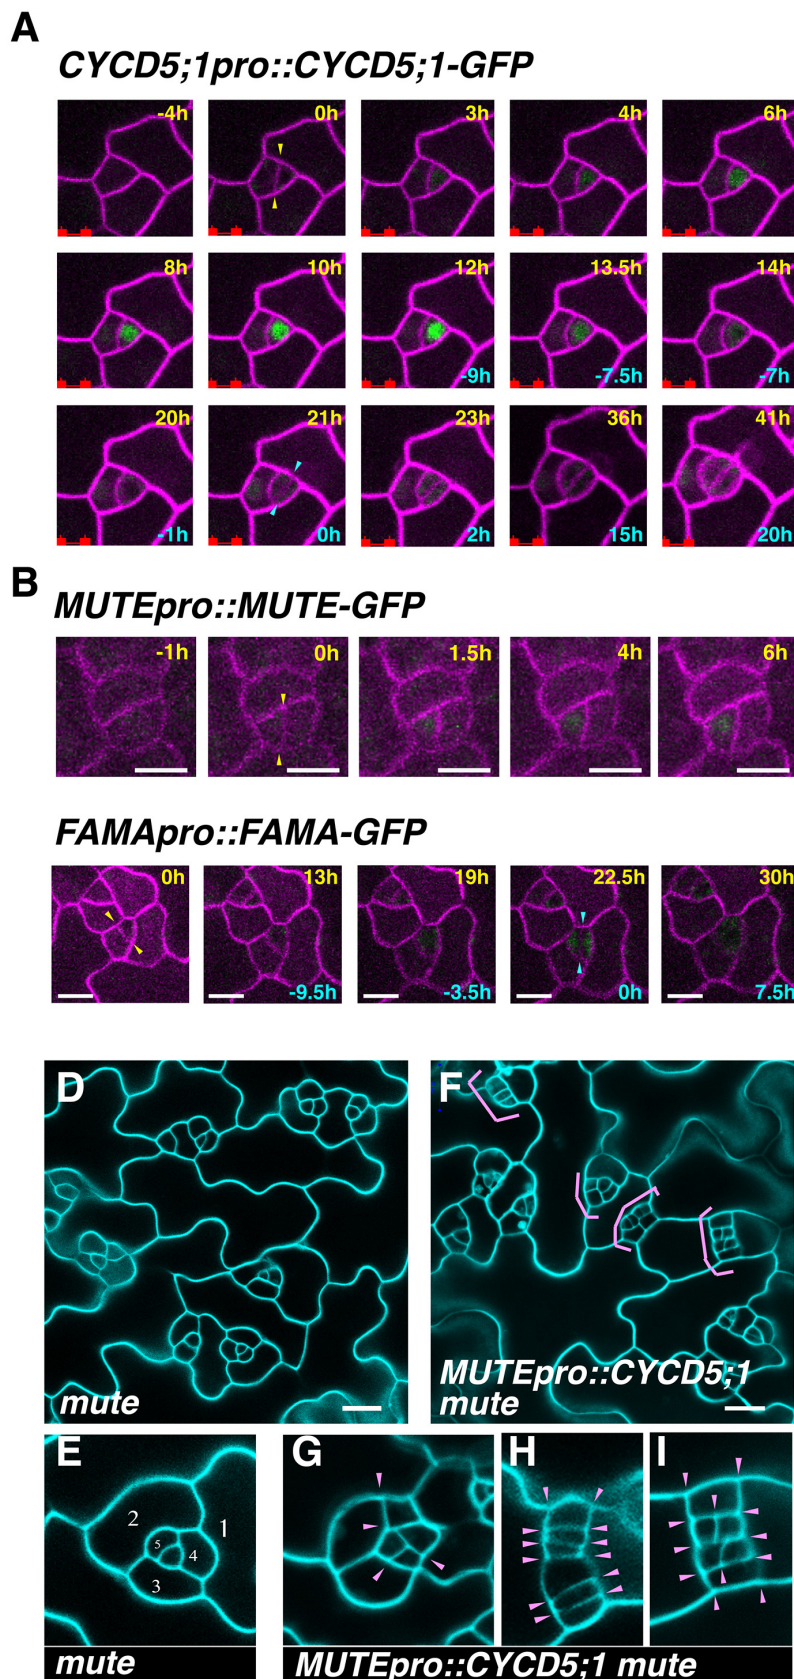

630 **Figure 3. CYCD5;1 promotes GMC symmetric cell division.**

631 (A) Transient CYCD5 accumulation (*CYCD5;1pro::CYCD5;1-GFP*) during meristemoid-to-GMC  
632 transition revealed by the time-lapse imaging. Yellow arrowheads indicate the last amplifying  
633 asymmetric cell division (ACD) of a meristemoid (hour 0 in yellow). Cyan arrowhead indicates  
634 the single symmetric cell division (SCD) that gives rise to paired guard cells (hour 0 in cyan).  
635 Scale bar, 10  $\mu\text{m}$ . For a full sequence, see Movie S1.

636 (B) MUTE (*MUTEpro::MUTE-GFP*) accumulation dynamics revealed by the time-lapse imaging.  
637 MUTE-GFP accumulates immediately after the last ACD (yellow arrowheads, hour 0), preceding  
638 the accumulation of CYCD5;1 (A). Scale bar, 5  $\mu\text{m}$ . For a full sequence, see Movie S2.

639 (C) FAMA (*FAMApr::FAMA-GFP*) accumulation dynamics revealed by the time-lapse imaging.  
640 FAMA-GFP accumulations are visible ~4 hours before the SCD of GMC (cyan arrowheads, hour  
641 0). Scale bar, 10  $\mu\text{m}$ . For a full sequence, see Movie S3.

642 (D-I) *CYCD5;1* expression in the arrested *mute* meristemoids is sufficient to trigger SCD-like  
643 divisions. Shown are cotyledon epidermis images from 2-week-old *mute* (D; inset E) and *mute*  
644 expressing *proMUTE::CYCD5;1* (F; insets G-I). In *mute*, each meristemoid arrests after ACDs in  
645 an inward-spiral manner (A and E, numbered by the order). *MUTEpro::CYCD5;1* in *mute*  
646 confers aberrant divisions (F, pink brackets) in perpendicular or parallel orientations (pink  
647 arrowheads, G-I). Scale bars, 20  $\mu\text{m}$ .

648

649

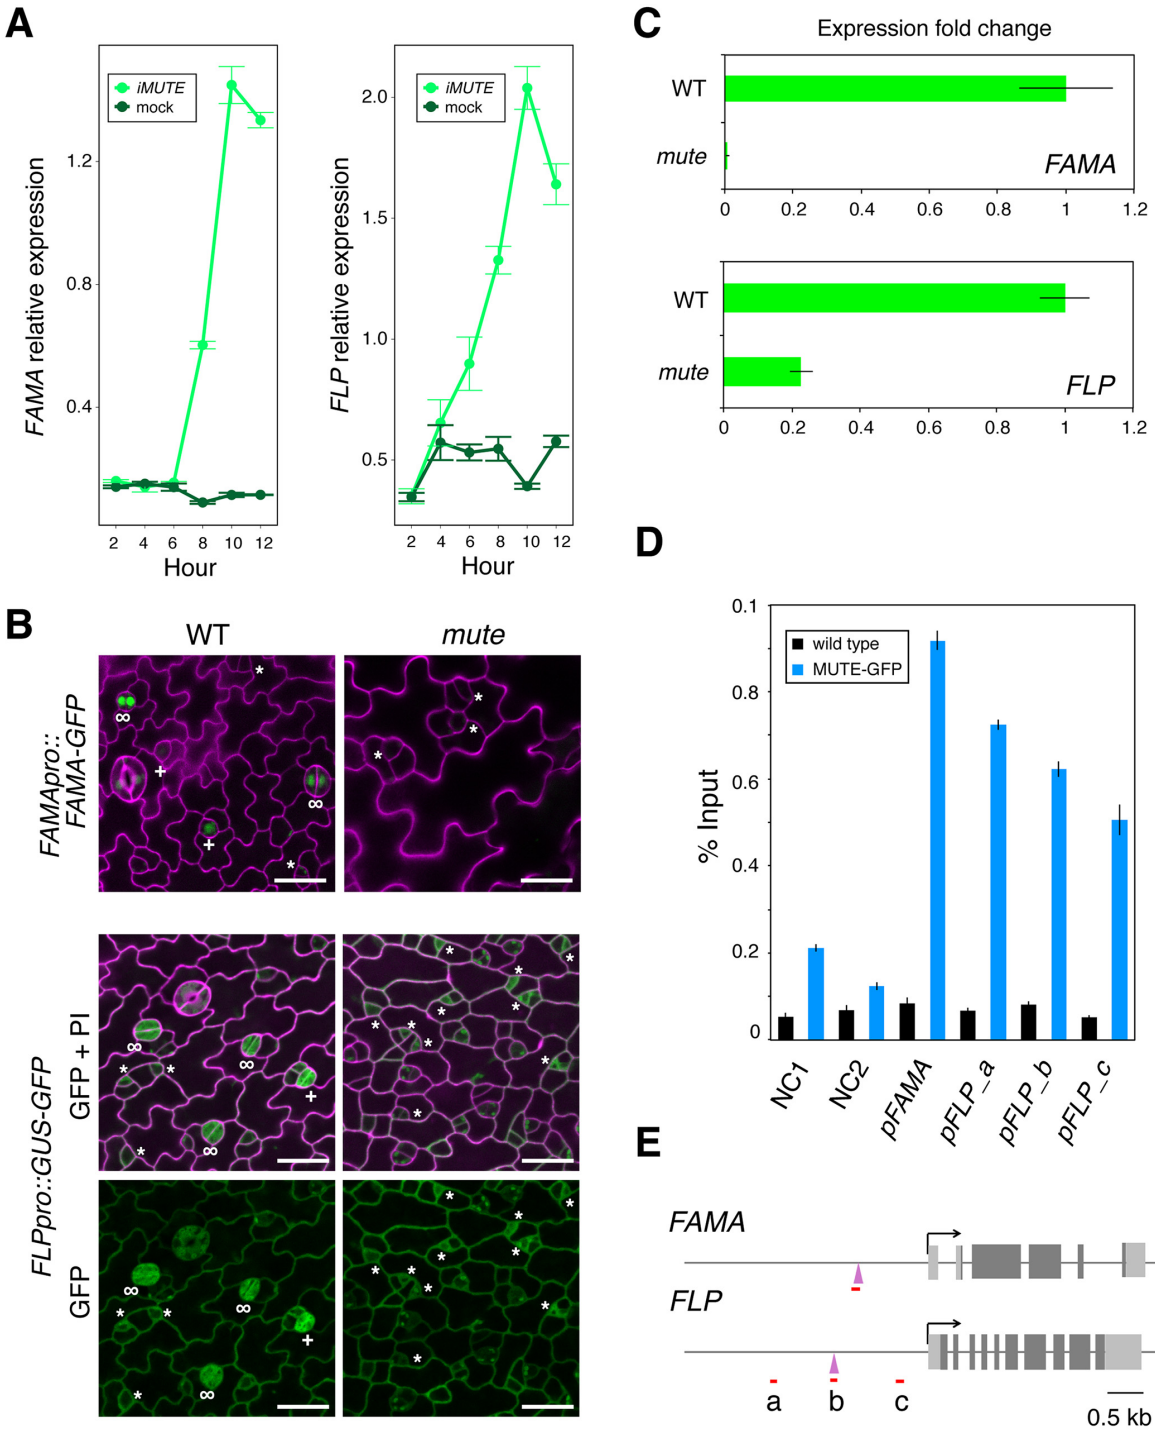

650

651

652

653

654 **Figure 4. *FAMA* and *FLP* are direct targets of *MUTE*.**

655 (A) Time course of *FAMA* and *FLP* relative expression by *iMUTE* vs. mock, qRT-PCR  
656 normalized against *ACT2*. Dots, mean values of three technical replicates; error bars, sem. For  
657 all three biological replicates, see Figure S3.

658 (B) *FAMA**pro::FAMA-GFP* and *FLP**pro::GUS-GFP* reporter expression in 5-day-old wild-type  
659 and *mute* epidermis. Asterisks, meristemoids; plus, GMCs; infinity, immature GCs. Scale bars,  
660 20  $\mu\text{m}$ .

661 (C) *FAMA* and *FLP* expression fold change in 7-day-old wild-type (WT) and two biological  
662 replicates of *mute* seedlings normalized against *ACTIN*. Bars, mean of three technical replicates.  
663 Error bars, s.d. See additional four biological replicates in Figure S5.

664 (D) ChIP assays showing the binding of functional *MUTE-GFP* at *FAMA* and *FLP* promoter  
665 regions. For detail see Figure 1. See additional two biological replicates in Figure S5.

666 (E) Diagrams of *FAMA* and *FLP* loci. Light gray rectangles, UTRs; dark gray rectangles, exons;  
667 arrows, transcriptional start sites; red line, amplicons; purple triangle, known SPCH binding sites  
668 (Lau et al., 2014).

669

670

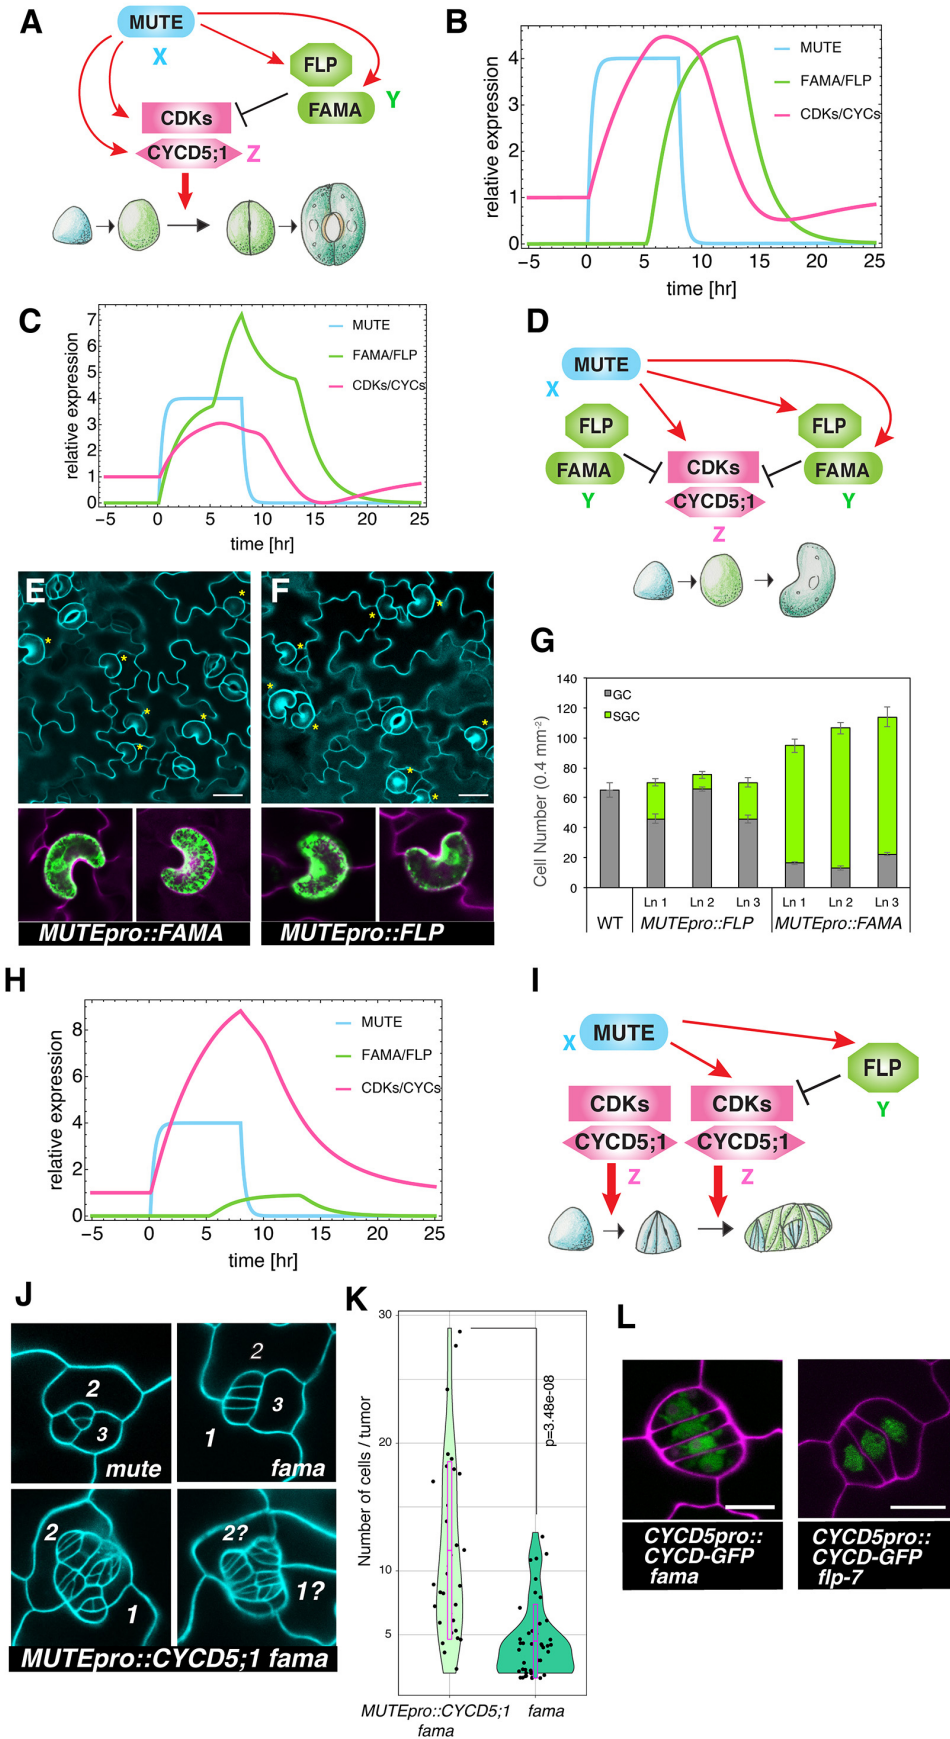

672 **Figure 5. MUTE orchestrates a single symmetric cell division to produce a stoma with**  
673 **paired guard cells**

674 (A) Architecture of type I incoherent feed-forward loop (I1-FFL) orchestrated by MUTE. MUTE  
675 induces both cell-cycle regulators driving SCD and transcription factors that repress these cell-  
676 cycle regulators.

677 (B) Dynamics of MUTE, FAMA/FLP and CDKs/CYC<sub>s</sub> reproduced by the mathematical model.  
678 Pulse of CDKs/CYC<sub>s</sub> is generated by successive induction by MUTE and repression by  
679 FAMA/FLP.

680 (C) Mathematical modeling prediction of the effects of precocious expression of FAMA/FLP. By  
681 inducing *FAMA/FLP* under the *MUTE* promoter results in decreased amplitude of CDKs/CYC<sub>s</sub>  
682 pulse, leading to absence of final cell division.

683 (D) Model diagram.

684 (E and F) Experimental perturbation. Precocious expressions of *FAMA* (E) and *FLP* (F) during  
685 meristemoid-to-GMC transition. Shown are 7-day-old abaxial cotyledon epidermis expressing  
686 *MUTE<sub>pro</sub>::FAMA* (C) and *MUTE<sub>pro</sub>::FLP*, both conferring stoma with single GCs (yellow  
687 asterisks). Scale bars, 20  $\mu$ m. Bottom insets, Mature GC GFP mature expression.

688 (G) Quantitative analysis of SCGs in three independent transgenic lines expressing *FAMA*  
689 (n=14, 14, 14) and *FLP* (n=15, 15, 17) driven by the *MUTE* promoter. Values are mean  $\pm$  s.e.m.

690 (H) Mathematical modeling simulating the precocious expression of CDK/CYC in *fama* (reduced  
691 level of FAMA/FLP). When *FAMA/FLP* level is reduced and *CDK/CYC* is directly upregulated by  
692 *MUTE* promoter, the resulting *CDK/CYC* pulse amplitude is much higher than that of wild type.

693 (I) Model diagram.

694 (J) Perturbation experiments. Precocious expression of *CYCD5;1* in *fama* triggers supernumerary  
695 symmetric divisions. Shown are 2-week-old adaxial cotyledon epidermis of *mute* (top left), *fama*  
696 (top right), and *MUTE<sub>pro</sub>::CYCD5;1 fama* (bottom). The order of amplifying ACDs are numbered.

697 (K) Quantitative analysis (violin plots) of cell numbers in each GMC tumors in *fama* (n= 43) and  
698 *MUTE<sup>pro</sup>::CYCD5;1 fama* (n=34). Dots, individual tumors; Pink rectangles, standard deviation.  
699 Wilcoxon rank sum test, p= 3.48e-08.  
700 (L) Persistent accumulation of *CYCD5;1* in the absence of *FAMA* or *FLP*. Confocal microscopy  
701 of GMC tumors in *fama* (top) and *flp-7* (bottom) expressing *CYCD5;1<sup>pro</sup>::CYCD5-GFP*.  
702  
703  
704



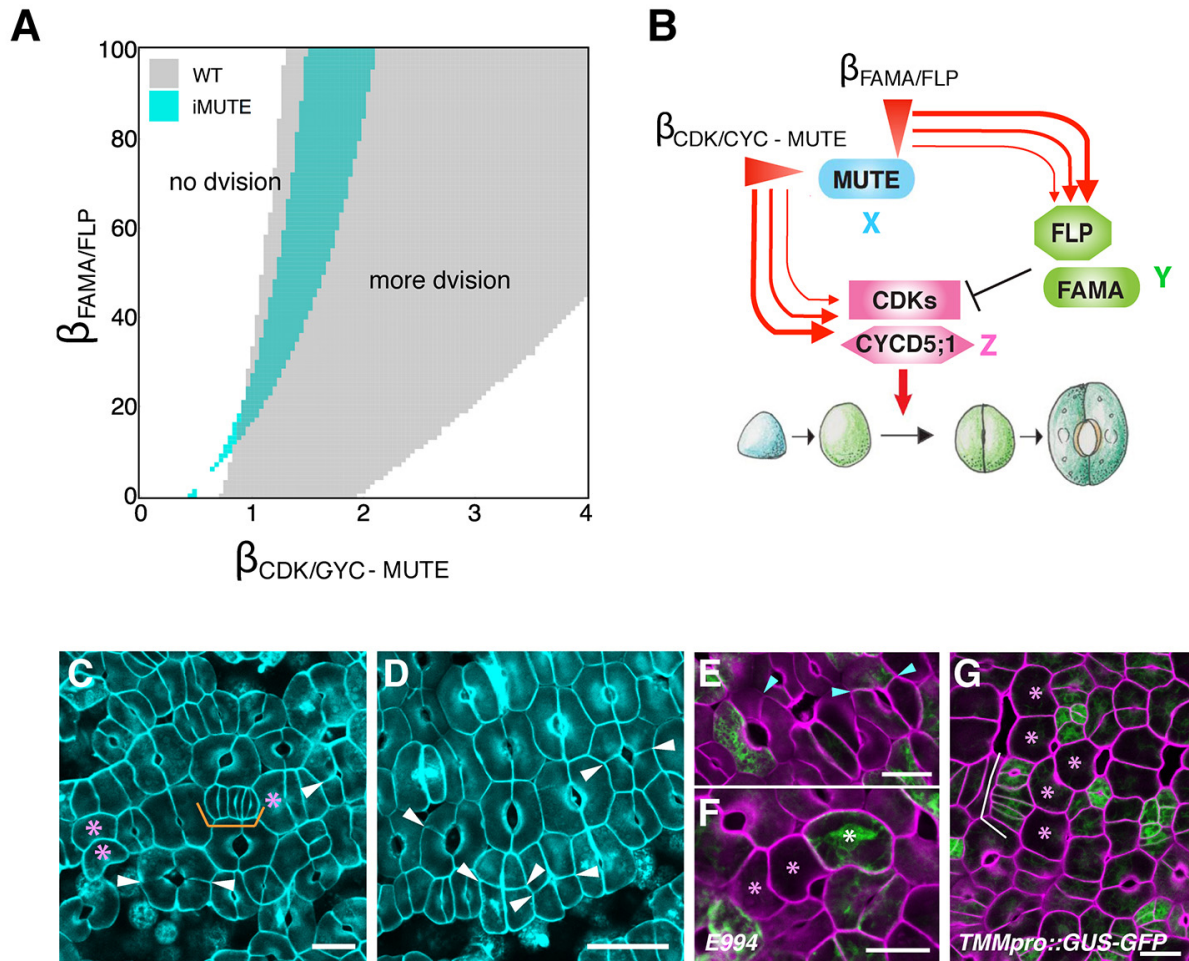

705

706 **Figure 6. Sustained, saturated MUTE expression could result in variable outcomes of**  
707 **stomatal differentiation.**

708 (A) Numerical simulation results obtained by changing the strength of the effect of MUTE over  
709 FAMA/FLP and CDKs/CYCs expression. The results were classified based on the duration of  
710 CDKs/CYCs activation. The parametric regions corresponding to the single cell division in wild  
711 type (gray) and *iMUTE* (cyan).

712 (B) Schematic Diagram showing the different strengths of MUTE on FAMA/FLP and  
713 CDKs/CYCs under *iMUTE* overexpression.

714 (C-G) Cotyledon abaxial epidermis of 3-day-old *iMUTE* seedlings grown in the presence of  
715 estradiol. Each image was taken from individual seedling. While most epidermal cells

716 differentiate into stomata, some become singular GCs (B, E, F, pink asterisks), rows of stomata  
717 from parallel extra divisions of GMCs (B, orange bracket; F, white bracket), or 3-4 celled  
718 stomata (white arrowheads) A subset of 3-4 celled stomata (D, plus) and singular GCs (E, white  
719 asterisk) express mature GC GFP marker, whereas parallel-dividing GMCs retain stomatal-  
720 lineage marker *TMMpro::GUS-GFP* (F, white bracket). Scale bars, 20  $\mu$ m.

721

722
